# Supplementary material
Source: publisher figshare collection journal article supplement (https://diabetesjournals.figshare.com/ndownloader/files/35113654)
Supplement: Supplementary file 1 [file 35113654]

## Supplementary Materials, Appendix

All subjects received the usual supplemental insulin dose unless BG was > 260 mg/dl at randomization for which resistant scale was used. If subjects are expected to be NPO, then the sensitive scale was used.

### Supplemental Sliding Scale Insulin (aspart/lispro) for the Intensive Supplement Group

BEFORE MEAL, Supplemental Sliding Scale Insulin (number of units) - Add to scheduled prandial insulin dose.

| Blood Glucose, mg/dl (mmol/L) | Sensitive | Usual | Resistant |
|-------------------------------|-----------|-------|-----------|
| ≤ 140 (≤7.8)                  | 0         | 0     | 0         |
| 141-180 (7.8-10.0)            | 2         | 3     | 4         |
| 181-220 (10.1-12.2)           | 3         | 4     | 6         |
| 221-260 (12.3-14.4)           | 4         | 5     | 8         |
| 261-300 (14.5-16.7)           | 5         | 6     | 10        |
| 301-350 (16.7-19.4)           | 6         | 8     | 12        |
| 351-400 (19.5-22.2)           | 7         | 10    | 14        |
| >400 (>22.2)                  | 8         | 12    | 16        |

BEDTIME, Supplemental Sliding Scale Insulin (number of units): Give half the meal time dose

| Blood Glucose (mg/dl) | Sensitive | Usual | Resistant |
|-----------------------|-----------|-------|-----------|
| < 221 (<12.3)         | 0         | 0     | 0         |
| 221-260 (12.3-14.4)   | 1         | 2     | 4         |
| 261-300 (14.5-16.7)   | 2         | 3     | 5         |
| 301-350 (16.7-19.4)   | 3         | 4     | 6         |
| 351-400 (19.5-22.2)   | 4         | 5     | 7         |
| >400 (> 22.2)         | 5         | 6     | 8         |

### Supplemental Sliding Scale Insulin (aspart/lispro) for the Non-Intensive Supplement Group

BEFORE MEAL, Supplemental Sliding Scale Insulin (number of units) - Add to scheduled prandial insulin dose

| Blood Glucose (mg/dl) | Sensitive | Usual | Resistant |
|-----------------------|-----------|-------|-----------|
| < 260 (<14.4)         | 0         | 0     | 0         |
| 261-300 (14.5-16.7)   | 5         | 6     | 10        |
| 301-350 (16.7-19.4)   | 6         | 8     | 12        |
| 351-400 (19.5-22.2)   | 7         | 10    | 14        |
| >400 (> 22.2)         | 8         | 12    | 16        |

BEDTIME, Supplemental Sliding Scale Insulin (number of units): Give half the meal time dose

| Blood Glucose (mg/dl) | Sensitive | Usual | Resistant |
|-----------------------|-----------|-------|-----------|
| < 260 (<14.4)         | 0         | 0     | 0         |
| 261-300 (14.5-16.7)   | 2         | 3     | 5         |
| 301-350 (16.7-19.4)   | 3         | 4     | 6         |
| 351-400 (19.5-22.2)   | 4         | 5     | 7         |

|               |   |   |   |
|---------------|---|---|---|
| >400 (> 22.2) | 5 | 6 | 8 |
|---------------|---|---|---|

### **Basal Insulin Titration:**

- Daily insulin dose will be adjusted as follow:
  - If the fasting BG is between 100 - 140 mg/dL in the absence of hypoglycemia the previous day: no change
  - If the fasting BG is between 140 - 180 mg/dL in the absence of hypoglycemia: increase basal insulin by 10% every day
  - If the fasting BG is >180 mg/dL in the absence of hypoglycemia the previous day: increase basal insulin dose by 20% every day
  - If fasting BG is < 70 mg/dl: decrease basal insulin dose by 20%

### **Prandial Dose Titration:**

The prandial doses were increased similarly to the basal doses if premeal (especially lunch and dinner) were elevated as follows:

BG 100-140 mg/dl- no change

BG 141-180 mg/dl- 10% increase in prandial dose

BG > 180 mg/dl- 20% increase in prandial dose

BG < 70 mg/dl- 20% decrease in prandial dose
